# Supplementary material for: Vibrational mode-specific dynamics of the F− + CH3CH2Cl multi-channel reaction
Source: Royal Society of Chemistry journal article supplement (doi:10.1039/d2cp00685e), 2022-01-01
Supplement: d2cp00685e1.pdf [file d2cp00685e1.pdf]

## **ELECTRONIC SUPPLEMENTARY INFORMATION**

### **Vibrational mode-specific dynamics of the $F^- + CH_3CH_2Cl$ multi-channel reaction**

**Viktor Tajti and Gábor Czako\***

MTA-SZTE Lendület Computational Reaction Dynamics Research Group, Interdisciplinary Excellence Centre  
and Department of Physical Chemistry and Materials Science, Institute of Chemistry, University of Szeged,  
Rerrich Béla tér 1, Szeged H-6720, Hungary

\* Email: [gczako@chem.u-szeged.hu](mailto:gczako@chem.u-szeged.hu)

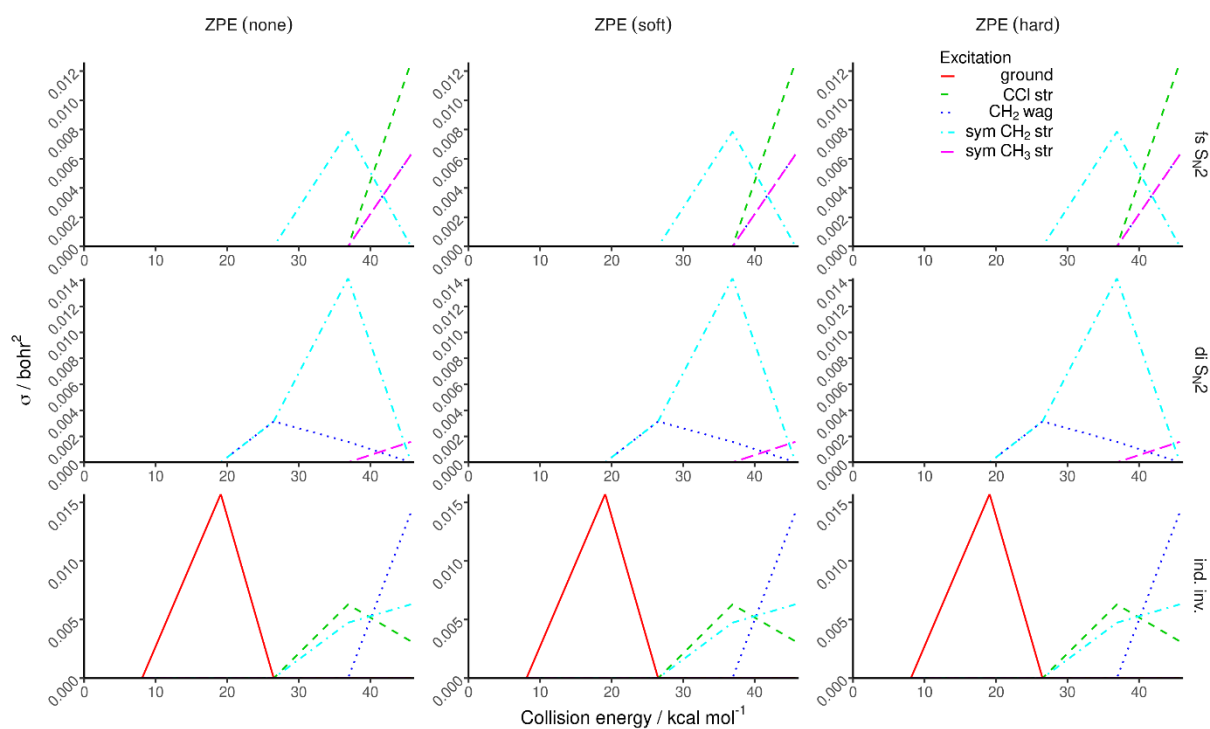

**Figure S1.** Cross sections for the front-side attack (fs  $S_N2$ ), double-inversion (di  $S_N2$ ), and induced-inversion (ind. inv.) pathways of the  $F^- + CH_3CH_2Cl(v_k = 0, 1)$  [ $k = 10, 7, 1, 3$ ] reactions as a function of collision energy obtained without and with soft and hard ZPE constraints (for these channels the soft and hard cases are equivalent).

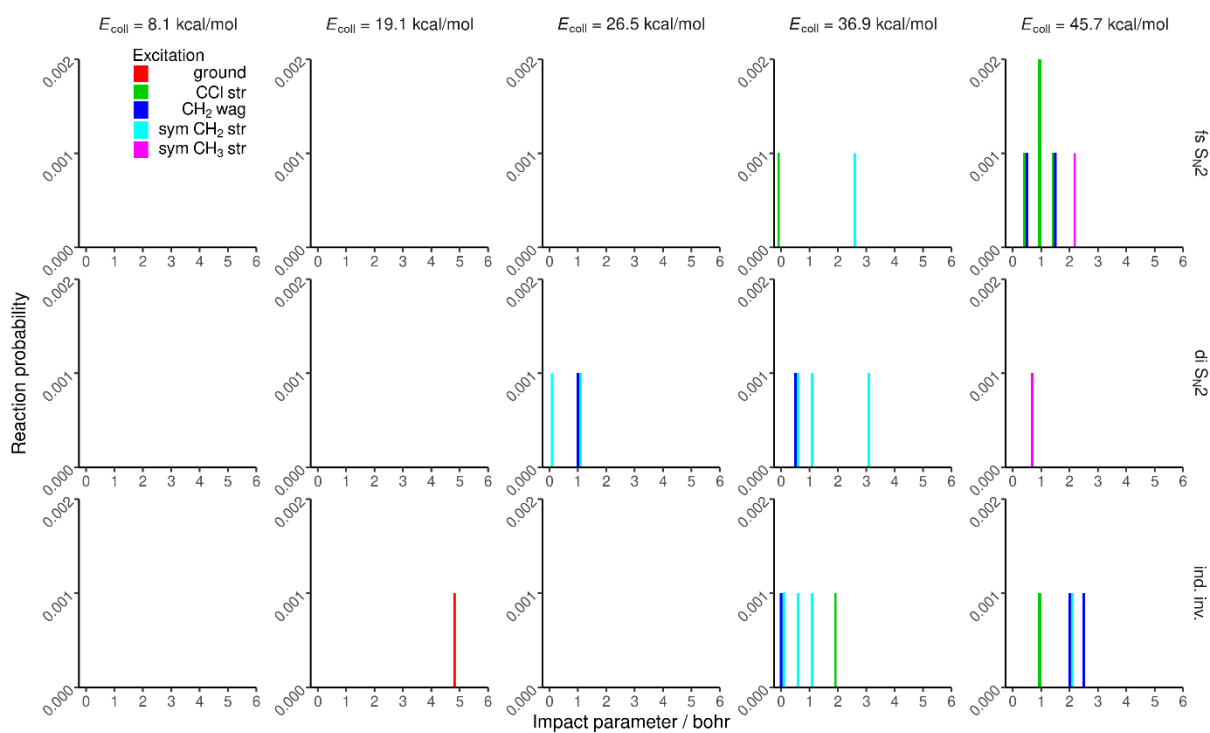

**Figure S2.** Reaction probabilities for the front-side attack (fs  $S_N2$ ), double-inversion (di  $S_N2$ ), and induced-inversion (ind. inv.) pathways of the  $F^- + CH_3CH_2Cl(v_k = 0, 1)$  [ $k = 10, 7, 1, 3$ ] reactions as a function of impact parameter at different collision energies.

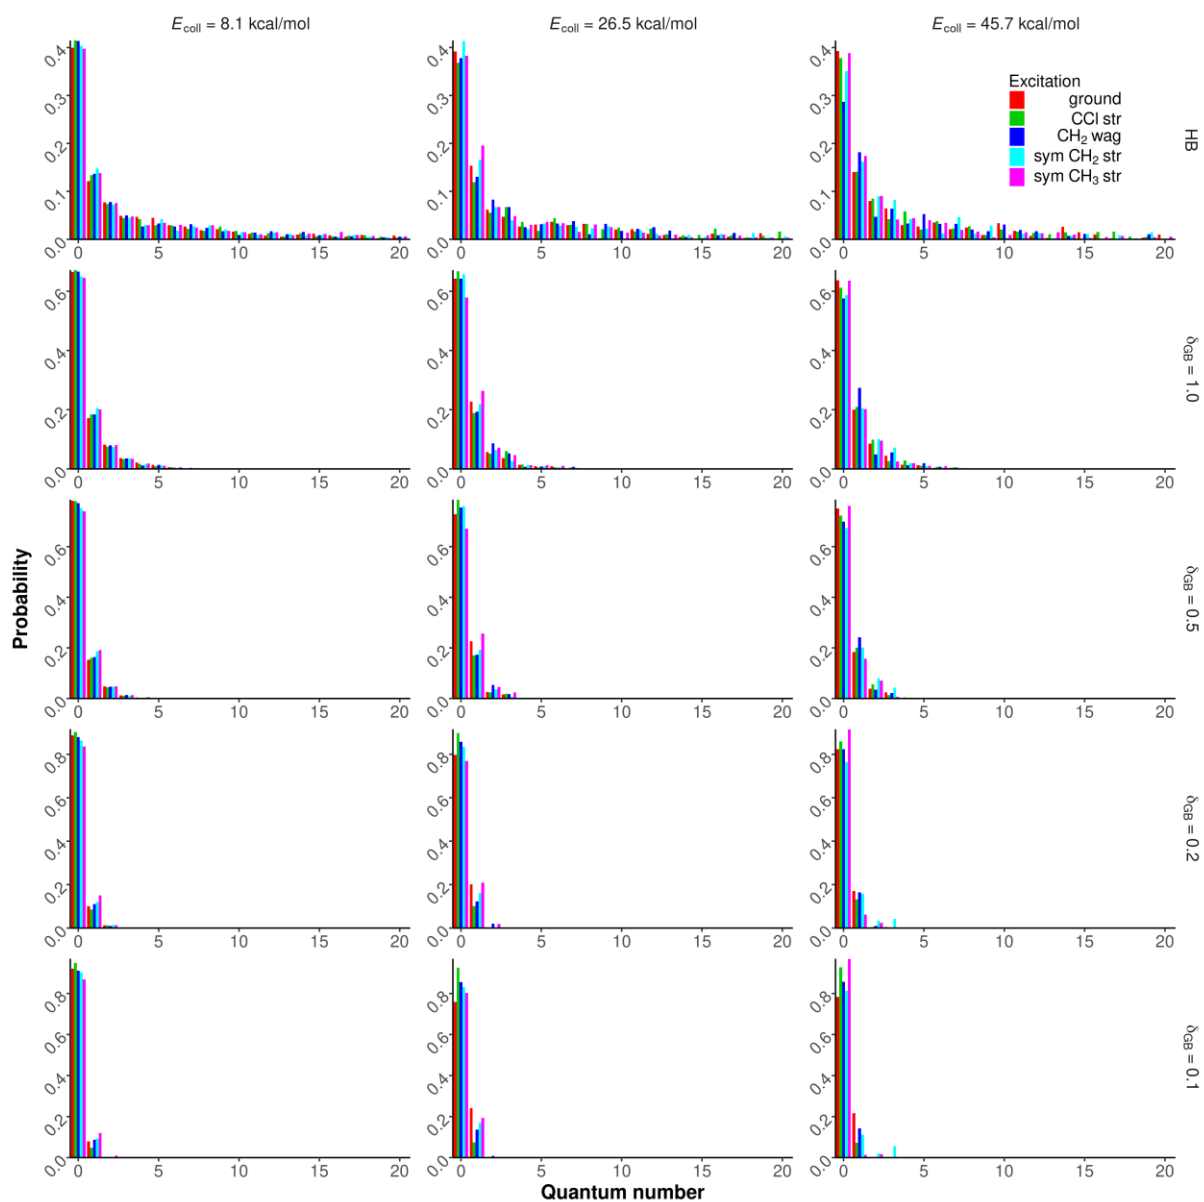

**Figure S3.** Normalized symmetric  $\text{CH}_3$  stretching mode specific vibrational distributions for the  $\text{CH}_3\text{CH}_2\text{F}$  product of the  $\text{F}^- + \text{CH}_3\text{CH}_2\text{Cl}(v_k = 0, 1)$  [ $k = 10, 7, 1, 3$ ]  $\text{S}_{\text{N}}2$  reactions at different collision energies obtained with histogram binning (HB) and Gaussian binning (GB) using different full-width at half-maximum ( $\delta$ ) values.

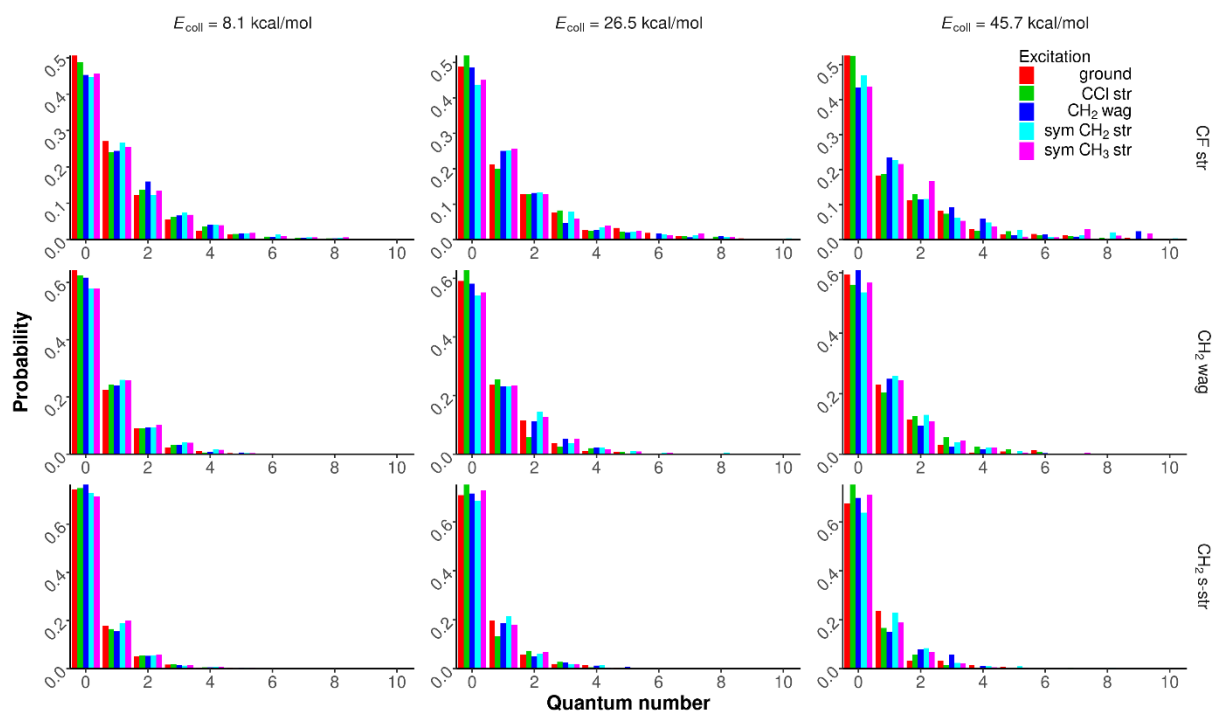

**Figure S4.** Normalized CF stretching,  $\text{CH}_2$  wagging, and symmetric  $\text{CH}_2$  stretching mode specific vibrational distributions for the  $\text{CH}_3\text{CH}_2\text{F}$  product of the  $\text{F}^- + \text{CH}_3\text{CH}_2\text{Cl}(v_k = 0, 1)$  [ $k = 10, 7, 1, 3$ ]  $\text{S}_{\text{N}}2$  reactions at different collision energies obtained with histogram binning.

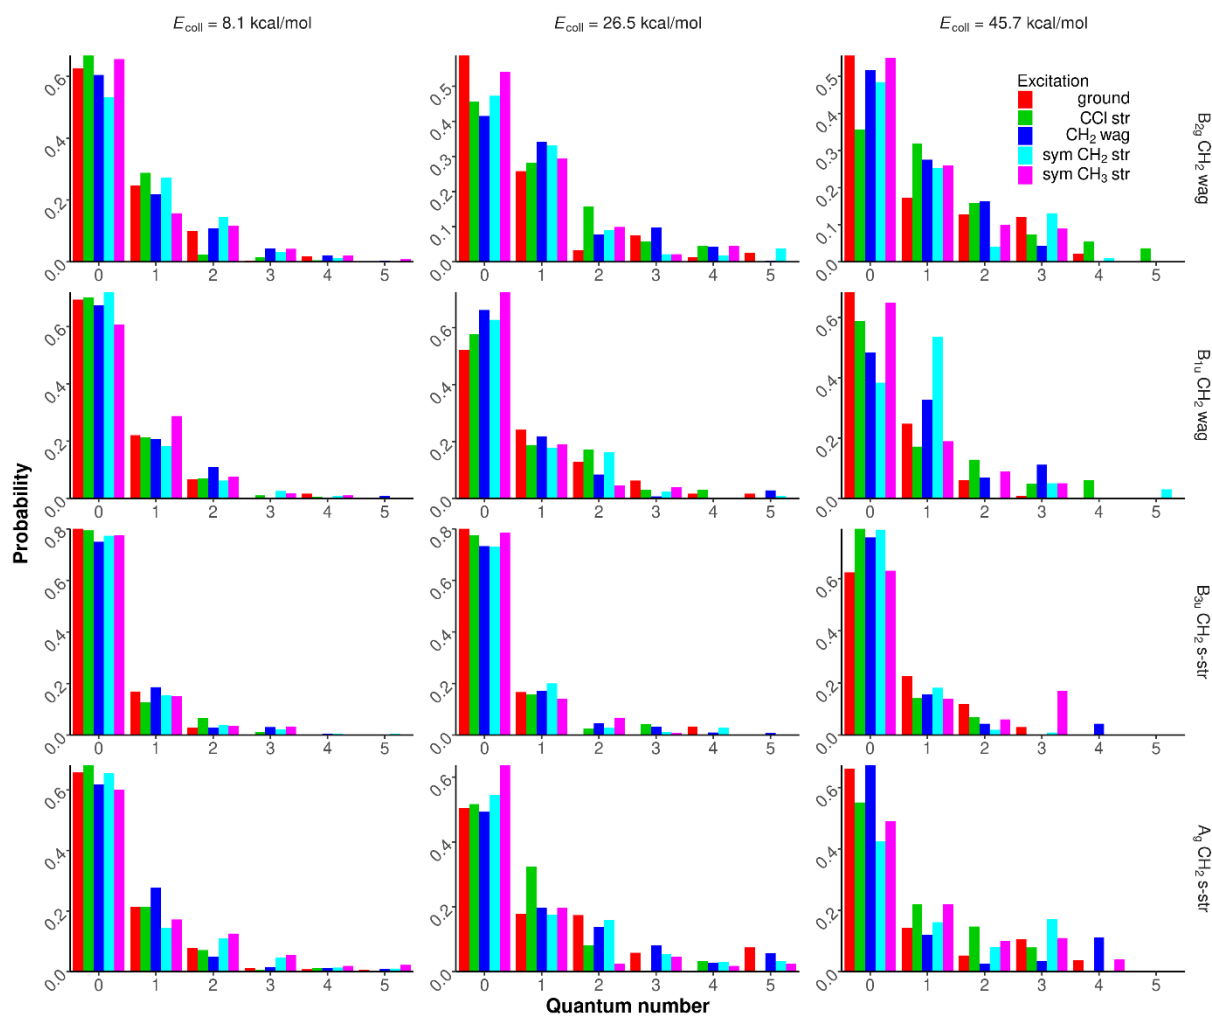

**Figure S5.** Normalized mode-specific vibrational distributions for the  $C_2H_4$  product of the  $F^- + CH_3CH_2Cl(v_k = 0, 1) \rightarrow FH \cdots Cl^- + C_2H_4$  [ $k = 10, 7, 1, 3$ ] reactions at different collision energies obtained with histogram binning.

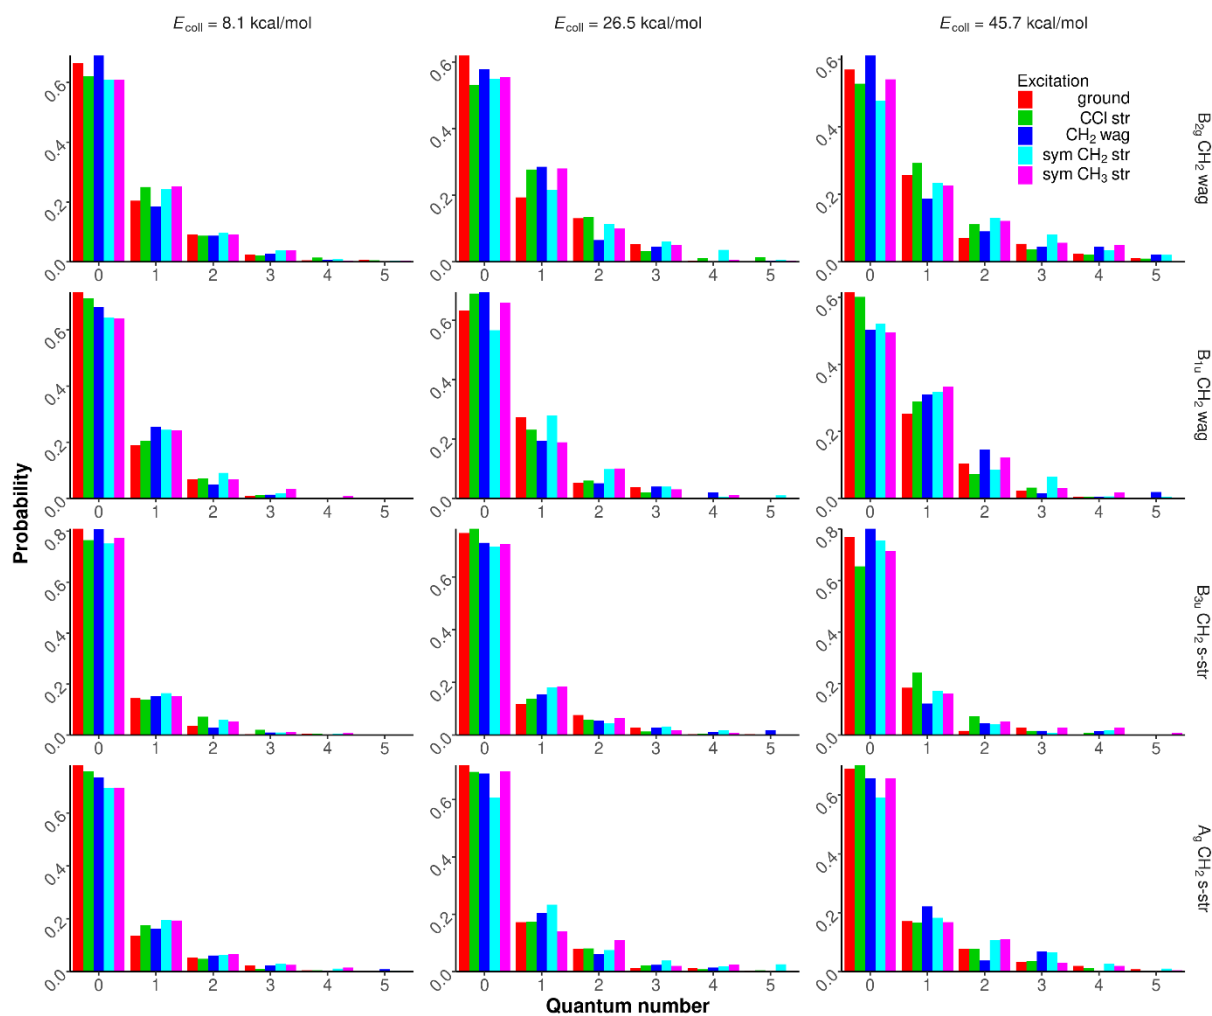

**Figure S6.** Normalized mode-specific vibrational distributions for the  $C_2H_4$  product of the  $F^- + CH_3CH_2Cl(v_k = 0, 1)$  [ $k = 10, 7, 1, 3$ ] syn-E2 reactions at different collision energies obtained with histogram binning.

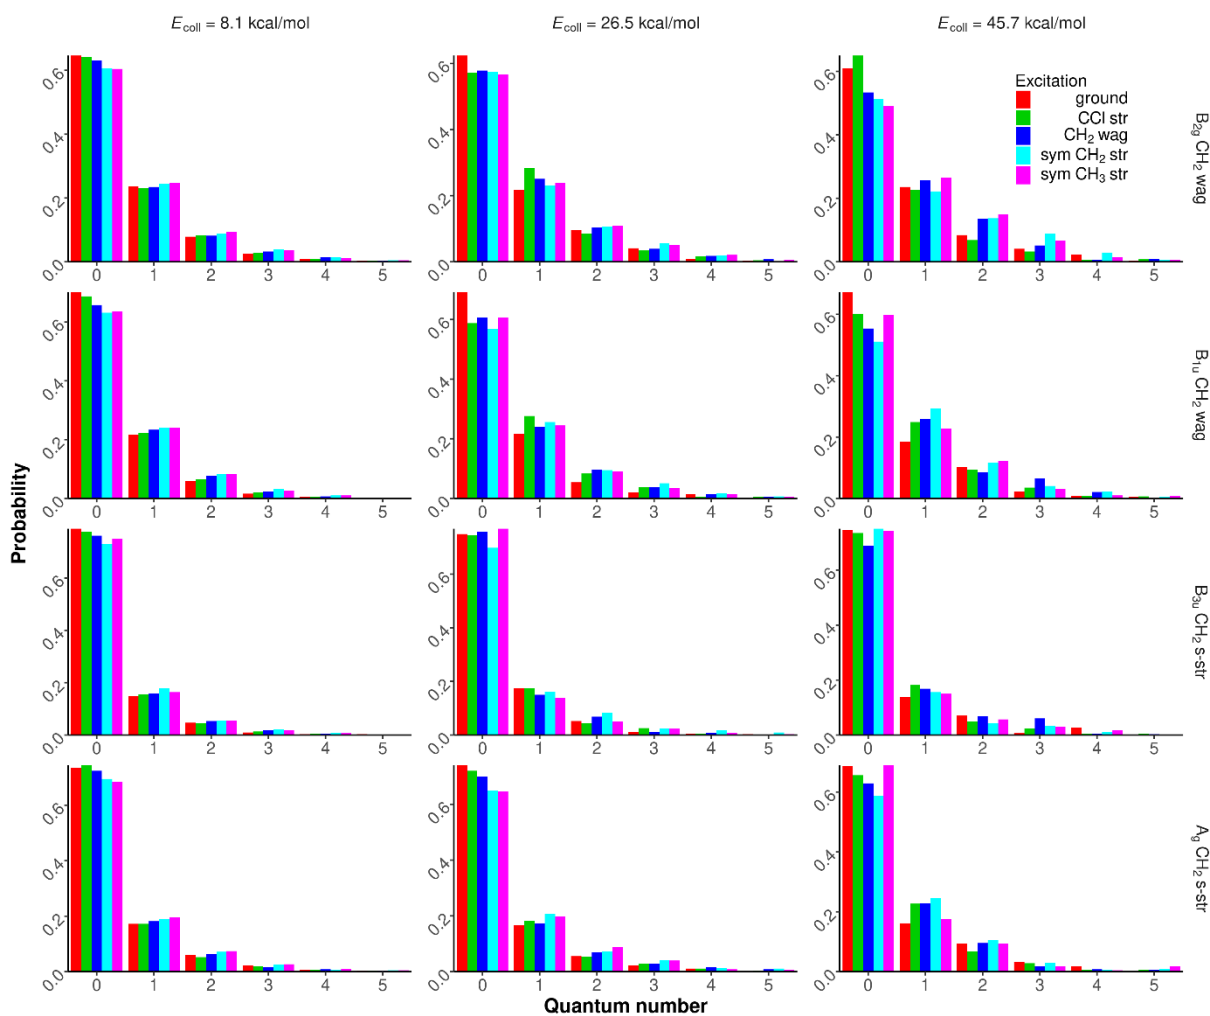

**Figure S7.** Normalized mode-specific vibrational distributions for the  $C_2H_4$  product of the  $F^- + CH_3CH_2Cl(v_k = 0, 1)$  [ $k = 10, 7, 1, 3$ ] anti-E2 reactions at different collision energies obtained with histogram binning.
